# Supplementary material for: Indicators for site characterization at seismic station: recommendation from a dedicated survey
Source: Springer Nature journal article supplement (doi:10.1007/s10518-021-01136-7), 2021-06-14
Supplement: MOESM1 [file 10518_2021_1136_MOESM1_ESM.pdf]

## Online Resource 1

The figures included in this Supplementary Material are the snapshots of the online Questionnaire used in: Cultrera G, Cornou C, Di Giulio G, Bard P-Y (2021) Indicators for site characterization at seismic station: recommendation from a dedicated survey. Bull Earthq Eng. <https://doi.org/10.1007/s10518-021-01136-7>

Corresponding author: Giovanna Cultrera ([giovanna.cultrera@ingv.it](mailto:giovanna.cultrera@ingv.it)), Istituto Nazionale di Geofisica e Vulcanologia (INGV), Italy.

**Fig. A1** Presentation page

**Fig. A2** Institution and scientific fields of participants.

**Fig. A3** Fundamental resonance frequency ( $f_0$ ).

**Fig. A4** Frequency peaks of higher modes ( $f_1, f_2, f_3, \dots$ ).

**Fig. A5** Amplitudes at fundamental frequency ( $A_0$ ) and higher modes ( $A_1, A_2, A_3, \dots$ ).

**Fig. A6** Site Transfer Function.

**Fig. A7** Preferential direction of ground motion.

**Fig. A8** Duration lengthening.

**Fig. A9** Near-surface attenuation factor at high frequency.

**Fig. A10** Frequency-dependent attenuation (e.g. Q, damping, kappa, etc.).

**Fig. A11** Travel time-averaged of shear-wave velocity ( $V_S$ ) over the uppermost 30m ( $V_{S30}$ ).

**Fig. A12** Travel-time average of shear-wave velocity at various depths above 30 m.

**Fig. A13** Travel-time average of shear-wave velocity at various depths below 30 m.

**Fig. A14**  $V_S$  of the seismological bedrock, corresponding to the geological unit that controls the lowest (fundamental) resonance frequency peak ( $f_0$ ) through the impedance contrast with the upper layers.

**Fig. A15** Depth of the seismological bedrock (see figure caption of Fig. A14).

**Fig. A16** Depth of the engineering bedrock that corresponds to the depth where a conventional  $V_S$  value is first exceeded; the conventional value of  $V_S$  generally depends on the seismic code: typical values are 760 m/s for rock and 1500 m/s for hard rock in NEHRP (BSSC 2015) or 800 m/s in EC8 (2004).

**Fig. A17** Subsoil velocity profile of shear-wave ( $V_S$ ) as a function of the depth ( $z$ ).

**Fig. A18** Subsoil velocity profile of shear-wave ( $V_p$ ) as a function of the depth ( $z$ ).

**Fig. A19** Surface-wave dispersion curve: phase-velocity or slowness as a function of frequency for Rayleigh and/or Love waves.

**Fig. A20** Ellipticity curve of Rayleigh waves.

**Fig. A21** Soil class according to a specific Seismic Building Code; it is also called "Ground Type" in EC8 (2004) or "Site Class" in some national building codes (BSSC 2015; NTC 2018).

**Fig. A22** Surface geology: geological/lithological information from available cartography (geological & thematic) and geological surveys.

**Fig. A23** Topographic class according to a specific Seismic Building Code; it usually accounts for values of slope and morphologic elements (landform).

**Fig. A24** Aggravation factor for basin and topography: ratio between 2D/3D/recorded-motion and 1D estimates for a given ground motion intensity measure; it can be scalar (e.g., PGA or Arias intensity) or frequency dependent (e.g. for STF, or amplification factor on response spectra).

**Fig. A25** Geometrical parameter: any parameter related with 2D or 3D structure (surface topography or underground lithological heterogeneity).

**Fig. A26** Stratigraphic column with geological unit description (1D log model).

**Fig. A27** Depth of the water table.

**Fig. A28** Non-linear degradation curves: curves characterizing the change of mechanical properties with shear strain ( $\gamma$ ), in terms of normalized stiffness modulus ( $G/G_0$ , where  $G_0$  is the small strain modulus), damping ratio ( $D$ ), and/or excess pore pressure ratio ( $R_u = \Delta u/p'$ , where  $\Delta u$  is the excess pore pressure and  $p'$  is the mean normal effective stress).

**Fig. A29** Geotechnical parameters: Piezocone test (CPTU), Flat dilatometer test (DMT), Standard penetration test (SPT), Dynamic probing super heavy test (DPSH), Vane test (VT), Static laboratory test (SLAB), etc.

**Fig. A30** 3-degrees priority scale ("mandatory", "recommended" or "optional") for ranking the indicators to be included in the site-characterization database.

**Fig. A31** Report if some important site effects were missing or poorly represented by the proposed indicators.

## EU-SERA WP7 : Questionnaire for site characterization in seismic site response studies

The objective of the WP7 "Networking databases of site and station characterization", of the SERA Project ("Seismology and Earthquake Engineering Research Infrastructure Alliance for Europe", Horizon 2020 grant agreement No.730900; <http://www.sera-eu.org/en/activities/networking>) is to propose a reliable and efficient European reference guideline for site characterization based on the requirements of seismic hazard and risk stakeholders.

Within the SERA Task 7.2 "Best practice and site characterization quality assessment", we have prepared this ONLINE Questionnaire in order to evaluate the site characterization indicators most relevant for seismic site response studies.

For each indicator, we kindly ask you :

- to select the best method of estimation of each indicator
- to indicate the feasibility index of each indicator (the feasibility index describes the level of difficulty for deriving that indicator, including data acquisition and method of analysis);
- to provide the approximate cost at one site for deriving each indicator.

As a final step, we kindly ask you to list, in order of priority, the most important parameters for site characterization.

NEXT

[Report an abuse case](#)

**Fig. A1** Online Questionnaire: presentation page.

## EU-SERA WP7 : Questionnaire for site characterization in seismic site response studies

Institution / Laboratory \*

Country

What is your scientific field ? \*

- Seismology
- Geophysics
- Geotechnical Engineering
- Engineering Seismology
- Civil Engineering
- Ground Motion Prediction Equation / PSHA
- Building Code
- Microzonation
- Risk Modeling
- Geology
- Other

In case you selected more than one field, please provide a sorted list from the most to the less appropriate

In case you want to receive the results of your questionnaire and to be informed on the outcomes of the questionnaire, please indicate your email address

**Fig. A2** Online Questionnaire: Institution and scientific fields of participants.

## EU-SERA WP7 : Questionnaire for site characterization in seismic site response studies

### Fundamental resonance frequency ( $f_0$ )

---

Data acquisition and processing \*  Noise  
 Earthquake  
 Modeling  
 I don't know

|              |                               |                                       |                                    |
|--------------|-------------------------------|---------------------------------------|------------------------------------|
| Noise *      | Easy<br><input type="radio"/> | Intermediate<br><input type="radio"/> | Difficult<br><input type="radio"/> |
| Earthquake * | Easy<br><input type="radio"/> | Intermediate<br><input type="radio"/> | Difficult<br><input type="radio"/> |
| Modeling *   | Easy<br><input type="radio"/> | Intermediate<br><input type="radio"/> | Difficult<br><input type="radio"/> |

|            |                                     |                                     |                                      |                                        |
|------------|-------------------------------------|-------------------------------------|--------------------------------------|----------------------------------------|
| Noise      | < 1 keuro<br><input type="radio"/>  | 1-5 keuros<br><input type="radio"/> | 5-20 keuros<br><input type="radio"/> | I do not know<br><input type="radio"/> |
| Earthquake | < 1 keuro<br><input type="radio"/>  | 1-5 keuros<br><input type="radio"/> | 5-20 keuros<br><input type="radio"/> | I do not know<br><input type="radio"/> |
| Modeling   | < 1 keuros<br><input type="radio"/> | 1-5 keuros<br><input type="radio"/> | 5-20 keuros<br><input type="radio"/> | I do not know<br><input type="radio"/> |

Free comments (on data acquisition, processing, analysis, cost, ....)

Question 1/29

PREVIOUS

NEXT

Fig. A3 Online Questionnaire: fundamental resonance frequency ( $f_0$ ).

## EU-SERA WP7 : Questionnaire for site characterization in seismic site response studies

Higher modes frequency peaks ( $f_1$ ,  $f_2$ ,  $f_3$ , ...)

---

Data acquisition and processing \*  Noise  
 Earthquake  
 Modeling  
 I don't know

|              |                                    |                                       |                                      |                                        |
|--------------|------------------------------------|---------------------------------------|--------------------------------------|----------------------------------------|
| Noise *      | Easy<br><input type="radio"/>      | Intermediate<br><input type="radio"/> | Difficult<br><input type="radio"/>   |                                        |
| Earthquake * | Easy<br><input type="radio"/>      | Intermediate<br><input type="radio"/> | Difficult<br><input type="radio"/>   |                                        |
| Modeling *   | Easy<br><input type="radio"/>      | Intermediate<br><input type="radio"/> | Difficult<br><input type="radio"/>   |                                        |
| Noise        | < 1 keuro<br><input type="radio"/> | 1-5 keuros<br><input type="radio"/>   | 5-20 keuros<br><input type="radio"/> | I do not know<br><input type="radio"/> |
| Earthquake   | < 1 keuro<br><input type="radio"/> | 1-5 keuros<br><input type="radio"/>   | 5-20 keuros<br><input type="radio"/> | I do not know<br><input type="radio"/> |
| Modeling     | < 1 keuro<br><input type="radio"/> | 1-5 keuros<br><input type="radio"/>   | 5-20 keuros<br><input type="radio"/> | I do not know<br><input type="radio"/> |

Question 2/29

PREVIOUS

webquest.fr - Report an abuse case

NEXT

Fig. A4 Online Questionnaire: frequency peaks of higher modes ( $f_1$ ,  $f_2$ ,  $f_3$ , ...).

## EU-SERA WP7 : Questionnaire for site characterization in seismic site response studies

### Amplitude at resonance frequencies (A0 A1 A2...)

Amplitude related to the resonance frequencies (fundamental and/or higher modes)

Data acquisition and processing \*  Noise  
 Earthquake  
 Modeling  
 I don't know

|              |                                    |                                       |                                      |                                        |
|--------------|------------------------------------|---------------------------------------|--------------------------------------|----------------------------------------|
| Noise *      | Easy<br><input type="radio"/>      | Intermediate<br><input type="radio"/> | Difficult<br><input type="radio"/>   |                                        |
| Earthquake * | Easy<br><input type="radio"/>      | Intermediate<br><input type="radio"/> | Difficult<br><input type="radio"/>   |                                        |
| Modeling *   | Easy<br><input type="radio"/>      | Intermediate<br><input type="radio"/> | Difficult<br><input type="radio"/>   |                                        |
| Noise        | < 1 keuro<br><input type="radio"/> | 1-5 keuros<br><input type="radio"/>   | 5-20 keuros<br><input type="radio"/> | I do not know<br><input type="radio"/> |
| Earthquake   | < 1 keuro<br><input type="radio"/> | 1-5 keuros<br><input type="radio"/>   | 5-20 keuros<br><input type="radio"/> | I do not know<br><input type="radio"/> |
| Modeling     | < 1 keuro<br><input type="radio"/> | 1-5 keuros<br><input type="radio"/>   | 5-20 keuros<br><input type="radio"/> | I do not know<br><input type="radio"/> |

Free comments (on data acquisition, processing, analysis, cost, ....)

Question 3/29

PREVIOUS

webquest.fr - Report an abuse case

NEXT

**Fig. A5** Online Questionnaire: amplitudes at fundamental frequency (A0) and higher modes (A1, A2, A3, ...).

## EU-SERA WP7 : Questionnaire for site characterization in seismic site response studies

### Site Transfer Function

Curve in the frequency domain describing the transfer function at a site

#### Data acquisition and processing \*

- Noise
- Earthquake
- Modeling
- I don't know

|              |                       |                       |                       |                       |
|--------------|-----------------------|-----------------------|-----------------------|-----------------------|
|              |                       | Easy                  | Intermediate          | Difficult             |
| Noise *      |                       | <input type="radio"/> | <input type="radio"/> | <input type="radio"/> |
| Earthquake * |                       | <input type="radio"/> | <input type="radio"/> | <input type="radio"/> |
| Modeling *   |                       | <input type="radio"/> | <input type="radio"/> | <input type="radio"/> |
|              | < 1 keuro             | 1-5 keuros            | 5-20 keuros           | I do not know         |
| Noise        | <input type="radio"/> | <input type="radio"/> | <input type="radio"/> | <input type="radio"/> |
| Earthquake   | <input type="radio"/> | <input type="radio"/> | <input type="radio"/> | <input type="radio"/> |
| Modeling     | <input type="radio"/> | <input type="radio"/> | <input type="radio"/> | <input type="radio"/> |

Free comments (on data acquisition, processing, analysis, cost, ....)

Question 4/29

PREVIOUS

NEXT

[Report an abuse case](#)

Fig. A6 Online Questionnaire: Site Transfer Function.



## EU-SERA WP7 : Questionnaire for site characterization in seismic site response studies

### Preferential direction of ground motion

Predominant direction of ground motion (for example computed by particle motions; rotated spectra; ellipticity vector by covariance matrix method; and/or time-frequency polarization analysis)

Data acquisition and processing \*  Noise  
 Earthquake  
 Modeling  
 I don't know

|              |                       |                       |                       |                       |
|--------------|-----------------------|-----------------------|-----------------------|-----------------------|
| Noise *      | Easy                  | Intermediate          | Difficult             |                       |
|              | <input type="radio"/> | <input type="radio"/> | <input type="radio"/> |                       |
| Earthquake * | Easy                  | Intermediate          | Difficult             |                       |
|              | <input type="radio"/> | <input type="radio"/> | <input type="radio"/> |                       |
| Modeling     | Easy                  | Intermediate          | Difficult             |                       |
|              | <input type="radio"/> | <input type="radio"/> | <input type="radio"/> |                       |
| Noise        | < 1 keuro             | 1-5 keuros            | 5-20 keuros           | I do not know         |
|              | <input type="radio"/> | <input type="radio"/> | <input type="radio"/> | <input type="radio"/> |
| Earthquake   | < 1 keuro             | 1-5 keuros            | 5-20 keuros           | I do not know         |
|              | <input type="radio"/> | <input type="radio"/> | <input type="radio"/> | <input type="radio"/> |
| Modeling     | < 1 keuro             | 1-5 keuros            | 5-20 keuros           | I do not know         |
|              | <input type="radio"/> | <input type="radio"/> | <input type="radio"/> | <input type="radio"/> |

Free comments: (on data acquisition, processing, analysis, cost, ....)

Question 5/29

PREVIOUS

NEXT

webquest.fr - Report an abuse case

Fig. A7 Online Questionnaire: preferential direction of ground motion.

## EU-SERA WP7 : Questionnaire for site characterization in seismic site response studies

### Duration Lengthening

frequency-dependent lengthening of seismic ground-motion duration

Data Acquisition and Processing \*  Noise  
 Earthquake  
 Modeling  
 I do not know

|              |                                    |                                       |                                      |                                        |
|--------------|------------------------------------|---------------------------------------|--------------------------------------|----------------------------------------|
| Noise *      | Easy<br><input type="radio"/>      | Intermediate<br><input type="radio"/> | Difficult<br><input type="radio"/>   |                                        |
| Earthquake * | Easy<br><input type="radio"/>      | Intermediate<br><input type="radio"/> | Difficult<br><input type="radio"/>   |                                        |
| Modeling *   | Easy<br><input type="radio"/>      | Intermediate<br><input type="radio"/> | Difficult<br><input type="radio"/>   |                                        |
| Noise        | < 1 keuro<br><input type="radio"/> | 1-5 keuros<br><input type="radio"/>   | 5-20 keuros<br><input type="radio"/> | I do not know<br><input type="radio"/> |
| Earthquake   | < 1 keuro<br><input type="radio"/> | 1-5 keuros<br><input type="radio"/>   | 5-20 keuros<br><input type="radio"/> | I do not know<br><input type="radio"/> |
| Modeling     | < 1 keuro<br><input type="radio"/> | 1-5 keuros<br><input type="radio"/>   | 5-20 keuros<br><input type="radio"/> | I do not know<br><input type="radio"/> |

Free comments (on data acquisition, processing, analysis, cost, ....)

Question 6 / 29

PREVIOUS

webquest.fr - Report an abuse case

NEXT

Fig. A8 Online Questionnaire: duration lengthening.

## EU-SERA WP7 : Questionnaire for site characterization in seismic site response studies

### Kappa0

high-frequency near-surface attenuation factor

---

Data acquisition and processing \*  Noise  
 Earthquake  
 Modeling  
 I don't know

|              |                                    |                                       |                                      |                                        |
|--------------|------------------------------------|---------------------------------------|--------------------------------------|----------------------------------------|
| Noise *      | Easy<br><input type="radio"/>      | Intermediate<br><input type="radio"/> | Difficult<br><input type="radio"/>   |                                        |
| Earthquake * | Easy<br><input type="radio"/>      | Intermediate<br><input type="radio"/> | Difficult<br><input type="radio"/>   |                                        |
| Modeling *   | Easy<br><input type="radio"/>      | Intermediate<br><input type="radio"/> | Difficult<br><input type="radio"/>   |                                        |
| Noise        | < 1 keuro<br><input type="radio"/> | 1-5 keuros<br><input type="radio"/>   | 5-20 keuros<br><input type="radio"/> | I do not know<br><input type="radio"/> |
| Earthquake   | < 1 keuro<br><input type="radio"/> | 1-5 keuros<br><input type="radio"/>   | 5-20 keuros<br><input type="radio"/> | I do not know<br><input type="radio"/> |
| Modeling     | < 1 keuro<br><input type="radio"/> | 1-5 keuros<br><input type="radio"/>   | 5-20 keuros<br><input type="radio"/> | I do not know<br><input type="radio"/> |

Free comments (on data acquisition, processing, analysis, cost, ....)

Question 7/29

PREVIOUS

webquest.fr - Report an abuse case

NEXT

Fig. A9 Online Questionnaire: near-surface attenuation factor at high frequency.

## EU-SERA WP7 : Questionnaire for site characterization in seismic site response studies

### Frequency-dependent attenuation (e.g. Q, damping, kappa, ...)

Model for near-surface attenuation (k), Quality factor (Q) or damping as a function of frequency

- Data acquisition and processing \*  Non invasive (active and/or passive) seismic methods  
 Invasive (measurements in boreholes)  
 Earthquake  
 Modeling  
 I do not know

|                                                        |                               |                                       |                                    |
|--------------------------------------------------------|-------------------------------|---------------------------------------|------------------------------------|
| Non invasive (active and/or passive) seismic methods * | Easy<br><input type="radio"/> | Intermediate<br><input type="radio"/> | Difficult<br><input type="radio"/> |
| Invasive (measurements in boreholes) *                 | Easy<br><input type="radio"/> | Intermediate<br><input type="radio"/> | Difficult<br><input type="radio"/> |
| Earthquake *                                           | Easy<br><input type="radio"/> | Intermediate<br><input type="radio"/> | Difficult<br><input type="radio"/> |
| Modeling                                               | Easy<br><input type="radio"/> | Intermediate<br><input type="radio"/> | Difficult<br><input type="radio"/> |

|                                                      |                                    |                                     |                                      |                                        |
|------------------------------------------------------|------------------------------------|-------------------------------------|--------------------------------------|----------------------------------------|
| Non invasive (active and/or passive) seismic methods | < 1 keuro<br><input type="radio"/> | 1-5 keuros<br><input type="radio"/> | 5-20 keuros<br><input type="radio"/> | I do not know<br><input type="radio"/> |
| Invasive (measurements in boreholes)                 | < 1 keuro<br><input type="radio"/> | 1-5 keuros<br><input type="radio"/> | 5-20 keuros<br><input type="radio"/> | I do not know<br><input type="radio"/> |
| Earthquake                                           | < 1 keuro<br><input type="radio"/> | 1-5 keuros<br><input type="radio"/> | 5-20 keuros<br><input type="radio"/> | I do not know<br><input type="radio"/> |
| Modeling                                             | < 1 keuro<br><input type="radio"/> | 1-5 keuros<br><input type="radio"/> | 5-20 keuros<br><input type="radio"/> | I do not know<br><input type="radio"/> |

Free comments (on data acquisition, processing, analysis, cost, ....)

Question 8/29

PREVIOUS

webquest.fr - Report an abuse case

NEXT

**Fig. A10** Online Questionnaire: frequency-dependent attenuation (e.g. Q, damping, kappa, etc.).

# EU-SERA WP7 : Questionnaire for site characterization in seismic site response s

## Vs30

The time-averaged shear-wave velocity over the uppermost 30 m

- Data acquisition and processing
- Geophysical measurements
  - Geotechnical measurements
  - DEM (Digital Elevation Model)
  - Geology
  - Modeling
  - I do not know

### Feasibility index (including data acquisition, processing and cost)

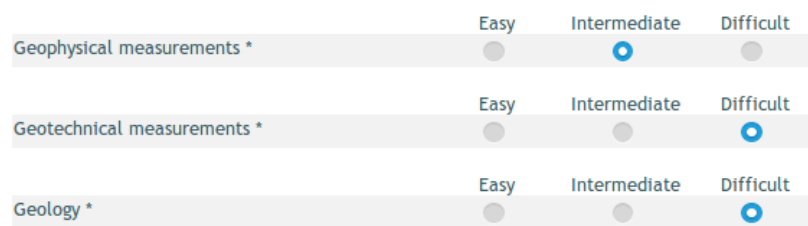

### Cost (including field data collection and analysis)

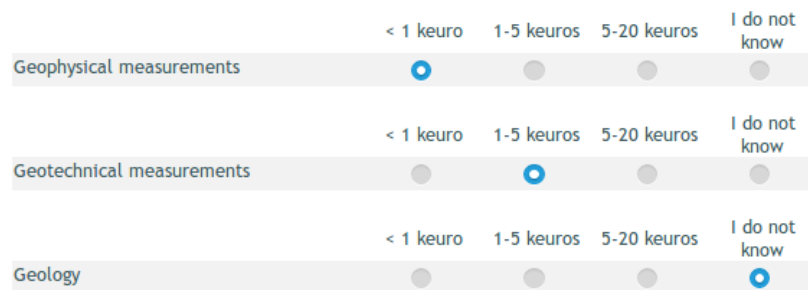

### Free comments (on data acquisition, processing, analysis, cost, ....)

Question 9/29

**Fig. A11** Online Questionnaire: travel time-averaged of shear-wave velocity (Vs) over the uppermost 30m (Vs30).

## EU-SERA WP7 : Questionnaire for site characterization in seismic site response studies

### Vsz (travel time-averaged shear-wave velocities up to 30 m)

Travel time-averaged of Vs at various depths up to 30 m (for example Vs10, Vs15, Vs20 considering an investigated depth of 10, 15 or 20 m, respectively)

Data acquisition and processing \*  Non Invasive (active and/or passive seismic methods)  
 Invasive (measurement in boreholes)  
 I do not know

Non Invasive (active and/or passive seismic methods) \*      Easy      Intermediate      Difficult  
           

Invasive (measurement in boreholes) \*      Easy      Intermediate      Difficult  
           

Non Invasive (active and/or passive seismic methods)      < 1 keuro      1-5 keuros      5-20 keuros      I do not know  
                 

Invasive (measurement in boreholes)      < 1 keuro      1-5 keuros      5-20 keuros      I do not know  
                 

Free comments (on data acquisition, processing, analysis, cost, ....)

Question 10/29

PREVIOUS

webquest.fr - Report an abuse case

NEXT

**Fig. A12** Online Questionnaire: travel-time average of shear-wave velocity at various depths above 30 m.

## EU-SERA WP7 : Questionnaire for site characterization in seismic site response studies

### Vsz (travel time-averaged shear-wave velocities above 30 m)

Travel time-averaged of Vs at different depth above to 30 m (for example Vs50, Vs100, Vs150 considering an investigated depth of 50, 100 or 150 m, respectively)

Data acquisition and processing \*  Non Invasive (active and/or passive seismic methods)  
 Invasive (measurement in boreholes)  
 I do not know

|                                                        |                       |                       |                       |
|--------------------------------------------------------|-----------------------|-----------------------|-----------------------|
|                                                        | Easy                  | Intermediate          | Difficult             |
| Non Invasive (active and/or passive seismic methods) * | <input type="radio"/> | <input type="radio"/> | <input type="radio"/> |

|                                       |                       |                       |                       |
|---------------------------------------|-----------------------|-----------------------|-----------------------|
|                                       | Easy                  | Intermediate          | Difficult             |
| Invasive (measurement in boreholes) * | <input type="radio"/> | <input type="radio"/> | <input type="radio"/> |

|                                                      |                       |                       |                       |                       |
|------------------------------------------------------|-----------------------|-----------------------|-----------------------|-----------------------|
|                                                      | < 1 keuro             | 1-5 keuros            | 5-20 keuros           | I do not know         |
| Non Invasive (active and/or passive seismic methods) | <input type="radio"/> | <input type="radio"/> | <input type="radio"/> | <input type="radio"/> |

|                                     |                       |                       |                       |                       |
|-------------------------------------|-----------------------|-----------------------|-----------------------|-----------------------|
|                                     | < 1 keuro             | 1-5 keuros            | 5-20 keuros           | I do not know         |
| Invasive (measurement in boreholes) | <input type="radio"/> | <input type="radio"/> | <input type="radio"/> | <input type="radio"/> |

Free comments (on data acquisition, processing, analysis, cost, ....)

Question 11/29

PREVIOUS

NEXT

webquest.fr - Report an abuse case

**Fig. A13** Online Questionnaire: travel-time average of shear-wave velocity at various depths below 30 m.

## EU-SERA WP7 : Questionnaire for site characterization in seismic site response studies

### Vs of the seismological bedrock

Please provide your favorite definition of a seismological bedrock (e.g. the impedance contrast related to the lowest resonance frequency peak; with Vs > 800 m/s; with Vs > 1000 m/s ....) \*

Data acquisition and processing \*  Non Invasive (active and/or passive seismic methods)  
 Invasive (measurement in boreholes)  
 I do not know

|                                                        |                       |                       |                       |
|--------------------------------------------------------|-----------------------|-----------------------|-----------------------|
|                                                        | Easy                  | Intermediate          | Difficult             |
| Non Invasive (active and/or passive seismic methods) * | <input type="radio"/> | <input type="radio"/> | <input type="radio"/> |

|                                       |                       |                       |                       |
|---------------------------------------|-----------------------|-----------------------|-----------------------|
|                                       | Easy                  | Intermediate          | Difficult             |
| Invasive (measurement in boreholes) * | <input type="radio"/> | <input type="radio"/> | <input type="radio"/> |

|                                                      |                       |                       |                       |                       |
|------------------------------------------------------|-----------------------|-----------------------|-----------------------|-----------------------|
|                                                      | < 1 keuro             | 1-5 keuros            | 5-20 keuros           | I do not know         |
| Non Invasive (active and/or passive seismic methods) | <input type="radio"/> | <input type="radio"/> | <input type="radio"/> | <input type="radio"/> |

|                                     |                       |                       |                       |                       |
|-------------------------------------|-----------------------|-----------------------|-----------------------|-----------------------|
|                                     | < 1 keuro             | 1-5 keuros            | 5-20 keuros           | I do not know         |
| Invasive (measurement in boreholes) | <input type="radio"/> | <input type="radio"/> | <input type="radio"/> | <input type="radio"/> |

Free comments: (on data acquisition, processing, analysis, cost, ....)

Question 12/29

PREVIOUS

webquest.fr - Report an abuse case

NEXT

**Fig. A14** Online Questionnaire:  $V_S$  of the seismological bedrock, corresponding to the geological unit that controls the lowest (fundamental) resonance frequency peak ( $f_0$ ) through the impedance contrast with the upper layers.



## EU-SERA WP7 : Questionnaire for site characterization in seismic site response studies

### Depth of the seismological bedrock

---

Data acquisition and processing \*  Non Invasive (active and/or passive seismic methods)  
 Invasive (measurement in boreholes)  
 I do not know

Non Invasive (active and/or passive seismic methods) \*      Easy      Intermediate      Difficult  
           

Invasive (measurement in boreholes) \*      Easy      Intermediate      Difficult  
           

Non Invasive (active and/or passive seismic methods)      < 1 keuro      1-5 keuros      5-20 keuros      I do not know  
                 

Invasive (measurement in boreholes)      < 1 keuro      1-5 keuros      5-20 keuros      I do not know  
                 

Free comments: (on data acquisition, processing, analysis, cost, ....)

Question 13/29

PREVIOUS

webquest.fr - Report an abuse case

NEXT

**Fig. A15** Online Questionnaire: Depth of the seismological bedrock (see figure caption of Fig. A14).

## EU-SERA WP7 : Questionnaire for site characterization in seismic site response studies

### Depth of the engineering bedrock

---

Please provide your definition of engineering bedrock \*

- $V_s(z) > 760$  m/s
- $V_s(z) > 800$  m/s
- $V_s(z) > 900$  m/s
- $V_s(z) > 1500$  m/s
- Other

Data acquisition and processing \*  Non Invasive (active and/or passive seismic methods)  
 Invasive (measurement in boreholes)  
 I do not know

|                                                        |                       |                       |                       |
|--------------------------------------------------------|-----------------------|-----------------------|-----------------------|
|                                                        | Easy                  | Intermediate          | Difficult             |
| Non Invasive (active and/or passive seismic methods) * | <input type="radio"/> | <input type="radio"/> | <input type="radio"/> |

|                                       |                       |                       |                       |
|---------------------------------------|-----------------------|-----------------------|-----------------------|
|                                       | Easy                  | Intermediate          | Difficult             |
| Invasive (measurement in boreholes) * | <input type="radio"/> | <input type="radio"/> | <input type="radio"/> |

|                                                      |                       |                       |                       |                       |
|------------------------------------------------------|-----------------------|-----------------------|-----------------------|-----------------------|
|                                                      | < 1 keuro             | 1-5 keuros            | 5-20 keuros           | I do not know         |
| Non Invasive (active and/or passive seismic methods) | <input type="radio"/> | <input type="radio"/> | <input type="radio"/> | <input type="radio"/> |

|                                     |                       |                       |                       |                       |
|-------------------------------------|-----------------------|-----------------------|-----------------------|-----------------------|
|                                     | < 1 keuro             | 1-5 keuros            | 5-20 keuros           | I do not know         |
| Invasive (measurement in boreholes) | <input type="radio"/> | <input type="radio"/> | <input type="radio"/> | <input type="radio"/> |

Free comments (on data acquisition, processing, analysis, cost, ....)

Question 14/29

PREVIOUS

webquest.fr - Report an abuse case

NEXT

**Fig. A16** Online Questionnaire: Depth of the engineering bedrock that corresponds to the depth where a conventional  $V_s$  value is first exceeded; the conventional value of  $V_s$  generally depends on the seismic code: typical values are 760 m/s for rock and 1500 m/s for hard rock in NEHRP (BSSC 2015) or 800 m/s in EC8 (2004).

# EU-SERA WP7 : Questionnaire for site characterization in seismic site response studies

**Vs(z)**  
Subsoil velocity profile of shear-wave (Vs) as function of the depth (z)

---

Data acquisition and processing \*  Non Invasive (active and/or passive seismic methods)  
 Invasive (measurement in boreholes)  
 I do not know

**Feasibility Index (including data acquisition, processing and cost)**

|                                                        | Easy                  | Intermediate                     | Difficult                        |
|--------------------------------------------------------|-----------------------|----------------------------------|----------------------------------|
| Non Invasive (active and/or passive seismic methods) * | <input type="radio"/> | <input checked="" type="radio"/> | <input type="radio"/>            |
| Invasive (measurement in boreholes) *                  | <input type="radio"/> | <input type="radio"/>            | <input checked="" type="radio"/> |

**Cost (including field data collection and analysis)**

|                                                      | < 1 keuro                        | 1-5 keuros            | 5-20 keuros           | I do not know                    |
|------------------------------------------------------|----------------------------------|-----------------------|-----------------------|----------------------------------|
| Non Invasive (active and/or passive seismic methods) | <input checked="" type="radio"/> | <input type="radio"/> | <input type="radio"/> | <input type="radio"/>            |
| Invasive (measurement in boreholes)                  | <input type="radio"/>            | <input type="radio"/> | <input type="radio"/> | <input checked="" type="radio"/> |

**Free comments (on data acquisition, processing, analysis, cost, ....)**

The feasibility and the cost depends on the depth of profile

Question 15/29

[PREVIOUS](#) [NEXT](#)

**Fig. A17** Online Questionnaire: Subsoil velocity profile of shear-wave (Vs) as a function of the depth (z).

## EU-SERA WP7 : Questionnaire for site characterization in seismic site response studies

### Vp(z)

Subsoil profile of compressional velocity (Vp) as function of the depth (z)

---

Data acquisition and processing \*  Non Invasive (active and/or passive seismic methods)  
 Invasive (measurement in boreholes)  
 I do not know

|                                                        |                               |                                       |                                    |
|--------------------------------------------------------|-------------------------------|---------------------------------------|------------------------------------|
| Non Invasive (active and/or passive seismic methods) * | Easy<br><input type="radio"/> | Intermediate<br><input type="radio"/> | Difficult<br><input type="radio"/> |
|--------------------------------------------------------|-------------------------------|---------------------------------------|------------------------------------|

|                                       |                               |                                       |                                    |
|---------------------------------------|-------------------------------|---------------------------------------|------------------------------------|
| Invasive (measurement in boreholes) * | Easy<br><input type="radio"/> | Intermediate<br><input type="radio"/> | Difficult<br><input type="radio"/> |
|---------------------------------------|-------------------------------|---------------------------------------|------------------------------------|

|                                                      |                                    |                                     |                                      |                                        |
|------------------------------------------------------|------------------------------------|-------------------------------------|--------------------------------------|----------------------------------------|
| Non Invasive (active and/or passive seismic methods) | < 1 keuro<br><input type="radio"/> | 1-5 keuros<br><input type="radio"/> | 5-20 keuros<br><input type="radio"/> | I do not know<br><input type="radio"/> |
|------------------------------------------------------|------------------------------------|-------------------------------------|--------------------------------------|----------------------------------------|

|                                     |                                    |                                     |                                      |                                        |
|-------------------------------------|------------------------------------|-------------------------------------|--------------------------------------|----------------------------------------|
| Invasive (measurement in boreholes) | < 1 keuro<br><input type="radio"/> | 1-5 keuros<br><input type="radio"/> | 5-20 keuros<br><input type="radio"/> | I do not know<br><input type="radio"/> |
|-------------------------------------|------------------------------------|-------------------------------------|--------------------------------------|----------------------------------------|

Free comments (on data acquisition, processing, analysis, cost, ....)

Question 16/29

PREVIOUS

NEXT

webquest.fr - Report an abuse case

**Fig. A18** Online Questionnaire: Subsoil velocity profile of shear-wave (Vp) as a function of the depth (z).

## EU-SERA WP7 : Questionnaire for site characterization in seismic site response studies

### Dispersion curve

Surface-wave dispersion curve; apparent phase-velocity or slowness as a function of frequency or wavelength

---

Data acquisition and processing \*  Non Invasive (active and/or passive seismic methods)  
 Invasive (measurement in boreholes)  
 I do not know

|                                                        |                                          |                                       |                                    |
|--------------------------------------------------------|------------------------------------------|---------------------------------------|------------------------------------|
| Non Invasive (active and/or passive seismic methods) * | Easy<br><input checked="" type="radio"/> | Intermediate<br><input type="radio"/> | Difficult<br><input type="radio"/> |
|--------------------------------------------------------|------------------------------------------|---------------------------------------|------------------------------------|

|                                       |                                          |                                       |                                    |
|---------------------------------------|------------------------------------------|---------------------------------------|------------------------------------|
| Invasive (measurement in boreholes) * | Easy<br><input checked="" type="radio"/> | Intermediate<br><input type="radio"/> | Difficult<br><input type="radio"/> |
|---------------------------------------|------------------------------------------|---------------------------------------|------------------------------------|

|                                                      |                                    |                                     |                                      |                                        |
|------------------------------------------------------|------------------------------------|-------------------------------------|--------------------------------------|----------------------------------------|
| Non Invasive (active and/or passive seismic methods) | < 1 keuro<br><input type="radio"/> | 1-5 keuros<br><input type="radio"/> | 5-20 keuros<br><input type="radio"/> | I do not know<br><input type="radio"/> |
|------------------------------------------------------|------------------------------------|-------------------------------------|--------------------------------------|----------------------------------------|

|                                     |                                    |                                     |                                      |                                        |
|-------------------------------------|------------------------------------|-------------------------------------|--------------------------------------|----------------------------------------|
| Invasive (measurement in boreholes) | < 1 keuro<br><input type="radio"/> | 1-5 keuros<br><input type="radio"/> | 5-20 keuros<br><input type="radio"/> | I do not know<br><input type="radio"/> |
|-------------------------------------|------------------------------------|-------------------------------------|--------------------------------------|----------------------------------------|

Free comments: (on data acquisition, processing, analysis, cost, ....)

Question 17/29

PREVIOUS

webquest.fr - Report an abuse case

NEXT

**Fig. A19** Online Questionnaire: Surface-wave dispersion curve: phase-velocity or slowness as a function of frequency for Rayleigh and/or Love waves.

## EU-SERA WP7 : Questionnaire for site characterization in seismic site response studies

### Rayleigh wave ellipticity curve

---

Data acquisition and processing \*  Non Invasive (active and/or passive seismic methods)  
 Invasive (measurement in boreholes)  
 I do not know

|                                                        |                               |                                       |                                    |
|--------------------------------------------------------|-------------------------------|---------------------------------------|------------------------------------|
| Non Invasive (active and/or passive seismic methods) * | Easy<br><input type="radio"/> | Intermediate<br><input type="radio"/> | Difficult<br><input type="radio"/> |
|--------------------------------------------------------|-------------------------------|---------------------------------------|------------------------------------|

|                                     |                               |                                       |                                    |
|-------------------------------------|-------------------------------|---------------------------------------|------------------------------------|
| Invasive (measurement in boreholes) | Easy<br><input type="radio"/> | Intermediate<br><input type="radio"/> | Difficult<br><input type="radio"/> |
|-------------------------------------|-------------------------------|---------------------------------------|------------------------------------|

|                                                      |                                    |                                     |                                      |                                        |
|------------------------------------------------------|------------------------------------|-------------------------------------|--------------------------------------|----------------------------------------|
| Non Invasive (active and/or passive seismic methods) | < 1 keuro<br><input type="radio"/> | 1-5 keuros<br><input type="radio"/> | 5-20 keuros<br><input type="radio"/> | I do not know<br><input type="radio"/> |
|------------------------------------------------------|------------------------------------|-------------------------------------|--------------------------------------|----------------------------------------|

|                                     |                                    |                                     |                                      |                                        |
|-------------------------------------|------------------------------------|-------------------------------------|--------------------------------------|----------------------------------------|
| Invasive (measurement in boreholes) | < 1 keuro<br><input type="radio"/> | 1-5 keuros<br><input type="radio"/> | 5-20 keuros<br><input type="radio"/> | I do not know<br><input type="radio"/> |
|-------------------------------------|------------------------------------|-------------------------------------|--------------------------------------|----------------------------------------|

Free comments (on data acquisition, processing, analysis, cost, ....)

Question 18/29

PREVIOUS

[webquest.fr - Report an abuse case](#)

NEXT

**Fig. A20** Online Questionnaire: Ellipticity curve of Rayleigh waves.

# EU-SERA WP7 : Questionnaire for site characterization in seismic site response studies

**Building Code Site Class**  
Ground class according to a specific Seismic Building Code

---

Please indicates the "Seismic Code" you usually refer to (e.g. EC8, NEHRP, AS, ...) \*

Data acquisition and processing \*  
 Geophysical measurements  
 Geotechnical measurements  
 DEM (Digital Elevation Model)  
 Geology  
 Modeling  
 I do not know

**Feasibility Index (Including data acquisition, processing and cost)**

|                             |                       |                                  |                                  |
|-----------------------------|-----------------------|----------------------------------|----------------------------------|
|                             | Easy                  | Intermediate                     | Difficult                        |
| Geophysical measurements *  | <input type="radio"/> | <input checked="" type="radio"/> | <input type="radio"/>            |
| Geotechnical measurements * | <input type="radio"/> | <input type="radio"/>            | <input checked="" type="radio"/> |

**Cost (Including field data collection and analysis)**

|                           |                       |                                  |                       |                       |
|---------------------------|-----------------------|----------------------------------|-----------------------|-----------------------|
|                           | < 1 keuro             | 1-5 keuros                       | 5-20 keuros           | I do not know         |
| Geophysical measurements  | <input type="radio"/> | <input checked="" type="radio"/> | <input type="radio"/> | <input type="radio"/> |
| Geotechnical measurements | <input type="radio"/> | <input checked="" type="radio"/> | <input type="radio"/> | <input type="radio"/> |

**Free comments (on data acquisition, processing, analysis, cost, ....)**

Question 19/29

[PREVIOUS](#) [NEXT](#)

**Fig. A21** Online Questionnaire: Soil class according to a specific Seismic Building Code; it is also called "Ground Type" in EC8 (2004) or "Site Class" in some national building codes (BSSC 2015; NTC 2018).

# EU-SERA WP7 : Questionnaire for site characterization in seismic site response studies

**Surface geology**  
Geological/lithological information from available cartography (geological & thematic) and geological surveys

---

Data acquisition and processing \*  Cartography (geological,DEM,lithological...)  
 Field survey  
 I do not know

**Feasibility Index (including data acquisition, processing and cost)**

|                                                | Easy                             | Intermediate          | Difficult             |
|------------------------------------------------|----------------------------------|-----------------------|-----------------------|
| Cartography (geological,DEM,lithological...) * | <input checked="" type="radio"/> | <input type="radio"/> | <input type="radio"/> |
| Field survey *                                 | <input type="radio"/>            | <input type="radio"/> | <input type="radio"/> |

**Cost (including field data collection and analysis)**

|                                              | < 1 keuro                        | 1-5 keuros            | 5-20 keuros           | I do not know                    |
|----------------------------------------------|----------------------------------|-----------------------|-----------------------|----------------------------------|
| Cartography (geological,DEM,lithological...) | <input type="radio"/>            | <input type="radio"/> | <input type="radio"/> | <input checked="" type="radio"/> |
| Field survey                                 | <input checked="" type="radio"/> | <input type="radio"/> | <input type="radio"/> | <input type="radio"/>            |

**Free comments (on data acquisition, processing, analysis, cost, ....)**

Cartography should be at scale 1:10000 or 1:5000. The feasibility and cost depends if already available or not

Question 20/29

[PREVIOUS](#) [NEXT](#)

webquest.fr - Report an abuse case

**Fig. A22** Online Questionnaire: Surface geology: geological/lithological information from available cartography (geological & thematic) and geological surveys.



## EU-SERA WP7 : Questionnaire for site characterization in seismic site response studies

### Topographic factor

Different interval values of slope and morphologic elements, following for example Building Seismic Code provisions to compute the topographic amplification

---

Data acquisition and processing \*  Cartography (geological, DEM, lithological...)  
 Field survey  
 I do not know

Cartography (geological, DEM, lithological...) \*    Easy    Intermediate    Difficult  
○                                                                    ○                                                                    ○

Field survey \*    Easy    Intermediate    Difficult  
○                                                                    ○                                                                    ○

|                                                |           |            |             |               |
|------------------------------------------------|-----------|------------|-------------|---------------|
|                                                | < 1 keuro | 1-5 keuros | 5-20 keuros | I do not know |
| Cartography (geological, DEM, lithological...) | ○         | ○          | ○           | ○             |

|              |           |            |             |               |
|--------------|-----------|------------|-------------|---------------|
|              | < 1 keuro | 1-5 keuros | 5-20 keuros | I do not know |
| Field survey | ○         | ○          | ○           | ○             |

Free comments (on data acquisition, processing, analysis, cost, ....)

Question 21/29

PREVIOUS

NEXT

**Fig. A23** Online Questionnaire: Topographic class according to a specific Seismic Building Code; it usually accounts for values of slope and morphologic elements (landform).

EU-SERA WP7 : Questionnaire for site characterization in seismic site response studies

**Aggravation factor for basin and topography**

Period-dependent "aggravation factor". Defined for example as the ratio between 2D (or recorded motion) and 1D acceleration response spectra at the basin surface

- Data acquisition and processing \*  Geophysical measurements  
 Geotechnical measurements  
 DEM (Digital Elevation Model)  
 Geology  
 Modeling  
 I do not know

Geophysical measurements \*  Easy  Intermediate  Difficult

Geotechnical measurements \*  Easy  Intermediate  Difficult

DEM (Digital Elevation Model) \*  Easy  Intermediate  Difficult

Geology \*  Easy  Intermediate  Difficult

Modeling \*  Easy  Intermediate  Difficult

Geophysical measurements  < 1 keuro  1-5 keuros  5-20 keuros  I do not know

Geotechnical measurements  < 1 keuro  1-5 keuros  5-20 keuros  I do not know

DEM (Digital Elevation Model)  < 1 keuro  1-5 keuros  5-20 keuros  I do not know

Geology  < 1 keuro  1-5 keuros  5-20 keuros  I do not know

Modeling  < 1 keuro  1-5 keuros  5-20 keuros  I do not know

Free comments (on data acquisition, processing, analysis, cost, ....)

Question 22/29

PREVIOUS

webquest.fr - Report an abuse case

NEXT

**Fig. A24** Online Questionnaire: Aggravation factor for basin and topography: ratio between 2D/3D/recorded-motion and 1D estimates for a given ground motion intensity measure; it can be scalar (e.g., PGA or Arias intensity) or frequency dependent (e.g. for STF, or amplification factor on response spectra).

## EU-SERA WP7 : Questionnaire for site characterization in seismic site response studies

### Geometrical parameter (horizontal distance from lithological heterogeneities)

Distance from lithological heterogeneity (e.g. fault, basin boundaries.....)

Data acquisition and processing \*  Cartography (geological, DEM, lithological, ...)

Field survey

I do not know

Cartography (geological, DEM, lithological, ...) \*  Easy  Intermediate  Difficult

Field survey \*  Easy  Intermediate  Difficult

Cartography (geological, DEM, lithological, ...)  < 1 keuro  1-5 keuros  5-20 keuros  I do not know

Field survey  < 1 keuro  1-5 keuros  5-20 keuros  I do not know

Free comments: (on data acquisition, processing, analysis, cost, ....)

Question 23/29

PREVIOUS

NEXT

webquest.fr - Report an abuse case

**Fig. A25** Online Questionnaire: Geometrical parameter: any parameter related with 2D or 3D structure (surface topography or underground lithological heterogeneity).

## EU-SERA WP7 : Questionnaire for site characterization in seismic site response studies

### Geo-stratigraphic 1D log model

Stratigraphic column including geological unit description

---

Data acquisition and processing \*  Non Invasive methods  
 Invasive (measurement in boreholes)  
 I do not know

|                        |                               |                                       |                                    |
|------------------------|-------------------------------|---------------------------------------|------------------------------------|
| Non Invasive methods * | Easy<br><input type="radio"/> | Intermediate<br><input type="radio"/> | Difficult<br><input type="radio"/> |
|------------------------|-------------------------------|---------------------------------------|------------------------------------|

|                                       |                               |                                       |                                    |
|---------------------------------------|-------------------------------|---------------------------------------|------------------------------------|
| Invasive (measurement in boreholes) * | Easy<br><input type="radio"/> | Intermediate<br><input type="radio"/> | Difficult<br><input type="radio"/> |
|---------------------------------------|-------------------------------|---------------------------------------|------------------------------------|

|                      |                                    |                                     |                                      |                                        |
|----------------------|------------------------------------|-------------------------------------|--------------------------------------|----------------------------------------|
| Non Invasive methods | < 1 keuro<br><input type="radio"/> | 1-5 keuros<br><input type="radio"/> | 5-20 keuros<br><input type="radio"/> | I do not know<br><input type="radio"/> |
|----------------------|------------------------------------|-------------------------------------|--------------------------------------|----------------------------------------|

|                                     |                                    |                                     |                                      |                                        |
|-------------------------------------|------------------------------------|-------------------------------------|--------------------------------------|----------------------------------------|
| Invasive (measurement in boreholes) | < 1 keuro<br><input type="radio"/> | 1-5 keuros<br><input type="radio"/> | 5-20 keuros<br><input type="radio"/> | I do not know<br><input type="radio"/> |
|-------------------------------------|------------------------------------|-------------------------------------|--------------------------------------|----------------------------------------|

Free comments (on data acquisition, processing, analysis, cost, ....)

Question 24/29

PREVIOUS

webquest.fr - Report an abuse case

NEXT

**Fig. A26** Online Questionnaire: Stratigraphic column with geological unit description (1D log model).

## EU-SERA WP7 : Questionnaire for site characterization in seismic site response studies

### Water table depth

Depth of the water table

---

Data acquisition and processing \*  Non Invasive methods  
 Invasive (measurement in boreholes)  
 I do not know

Non Invasive methods \* 

|                       |                       |                       |
|-----------------------|-----------------------|-----------------------|
| Easy                  | Intermediate          | Difficult             |
| <input type="radio"/> | <input type="radio"/> | <input type="radio"/> |

Invasive (measurement in boreholes) \* 

|                       |                       |                       |
|-----------------------|-----------------------|-----------------------|
| Easy                  | Intermediate          | Difficult             |
| <input type="radio"/> | <input type="radio"/> | <input type="radio"/> |

Non Invasive methods 

|                       |                       |                       |                       |
|-----------------------|-----------------------|-----------------------|-----------------------|
| < 1 keuro             | 1-5 keuros            | 5-20 keuros           | I do not know         |
| <input type="radio"/> | <input type="radio"/> | <input type="radio"/> | <input type="radio"/> |

Invasive (measurement in boreholes) 

|                       |                       |                       |                       |
|-----------------------|-----------------------|-----------------------|-----------------------|
| < 1 keuro             | 1-5 keuros            | 5-20 keuros           | I do not know         |
| <input type="radio"/> | <input type="radio"/> | <input type="radio"/> | <input type="radio"/> |

Free comments (on data acquisition, processing, analysis, cost, ....)

Question 25 / 29

PREVIOUS

[webquest.fr - Report an abuse case](#)

NEXT

Fig. A27 Online Questionnaire: Depth of the water table.

## EU-SERA WP7 : Questionnaire for site characterization in seismic site response studies

**Non-linear curves (e.g. G/Gmax, damping shear-strain curves)**

Subsoil non linear curves as a function of the shear strain ( $\gamma$ ), in terms of normalized stiffness modulus ( $G/G_0$ , where  $G_0$  is the small strain modulus), damping ratio ( $D$ ), and/or excess pore pressure ratio ( $R_u = \Delta u/p'$ , where  $\Delta u$  is the excess pore pressure and  $p'$  is the mean normal effective stress).

- Data acquisition and processing \*  Laboratory test  
 In-situ measurements  
 Earthquakes  
 I do not know

|                        |                                    |                                       |                                      |                                        |
|------------------------|------------------------------------|---------------------------------------|--------------------------------------|----------------------------------------|
| Laboratory test *      | Easy<br><input type="radio"/>      | Intermediate<br><input type="radio"/> | Difficult<br><input type="radio"/>   |                                        |
| In-situ measurements * | Easy<br><input type="radio"/>      | Intermediate<br><input type="radio"/> | Difficult<br><input type="radio"/>   |                                        |
| Earthquakes *          | Easy<br><input type="radio"/>      | Intermediate<br><input type="radio"/> | Difficult<br><input type="radio"/>   |                                        |
| Laboratory test        | < 1 keuro<br><input type="radio"/> | 1-5 keuros<br><input type="radio"/>   | 5-20 keuros<br><input type="radio"/> | I do not know<br><input type="radio"/> |
| In-situ measurements   | < 1 keuro<br><input type="radio"/> | 1-5 keuros<br><input type="radio"/>   | 5-20 keuros<br><input type="radio"/> | I do not know<br><input type="radio"/> |
| Earthquakes            | < 1 keuro<br><input type="radio"/> | 1-5 keuros<br><input type="radio"/>   | 5-20 keuros<br><input type="radio"/> | I do not know<br><input type="radio"/> |

**Free comments (on data acquisition, processing, analysis, cost, ....)**

Question 26/29

PREVIOUS

NEXT

**Fig. A28** Online Questionnaire: Non-linear degradation curves: curves characterizing the change of mechanical properties with shear strain ( $\gamma$ ), in terms of normalized stiffness modulus ( $G/G_0$ , where  $G_0$  is the small strain modulus), damping ratio ( $D$ ), and/or excess pore pressure ratio ( $R_u = \Delta u/p'$ , where  $\Delta u$  is the excess pore pressure and  $p'$  is the mean normal effective stress).

## EU-SERA WP7 : Questionnaire for site characterization in seismic site response studies

### Geotechnical parameter (e.g. SPT, CPT, qu Plasticity Index, CRR.... )

geotechnical parameters; e.g. SPT, CPTU, DMT, SPT, DPSH, VT, SLAB, CRR, Plasticity Index,.....:

- SPT Standard Penetration Test
- CPTU Piezocone testqu Unconfined compressive strength
- DMT Flat dilatometer test
- SPT Standard penetration test
- DPSH Dynamic probing super heavy test
- VT Vane test
- SLAB Static laboratory test
- CRR Cyclic Resistance Ratio

- Data acquisition and processing \*  Laboratory test  
 In-situ measurements  
 I do not know

Laboratory test \*                      Easy              Intermediate              Difficult  
                                                                           

In-situ measurements \*                      Easy              Intermediate              Difficult  
                                                                           

Laboratory test                      < 1 keuro      1-5 keuros      5-20 keuros      I do not know  
                                                                                                                 

In-situ measurements                      < 1 keuro      1-5 keuros      5-20 keuros      I do not know  
                                                                                                                 

### Free comments (on data acquisition, processing, analysis, cost, ....)

Question 27/29

PREVIOUS

NEXT

**Fig. A29** Online Questionnaire: Geotechnical parameters: Piezocone test (CPTU), Flat dilatometer test (DMT), Standard penetration test (SPT), Dynamic probing super heavy test (DPSH), Vane test (VT), Static laboratory test (SLAB), etc.

## EU-SERA WP7 : Questionnaire for site characterization in seismic site response studies

### Most Important Indicators

Among the following indicators which are the ones that are important and should be available in site characterization databases ?

|                                                                   | Mandatory             | Recommended           | Optional              | I do not know         |
|-------------------------------------------------------------------|-----------------------|-----------------------|-----------------------|-----------------------|
| Fundamental Resonance Frequency (f0) *                            | <input type="radio"/> | <input type="radio"/> | <input type="radio"/> | <input type="radio"/> |
| Higher resonance frequencies (f1 f2 f3....) *                     | <input type="radio"/> | <input type="radio"/> | <input type="radio"/> | <input type="radio"/> |
| Amplitude at resonance frequencies (A0 A1 A2....) *               | <input type="radio"/> | <input type="radio"/> | <input type="radio"/> | <input type="radio"/> |
| Site Amplification Function *                                     | <input type="radio"/> | <input type="radio"/> | <input type="radio"/> | <input type="radio"/> |
| Kappa0 *                                                          | <input type="radio"/> | <input type="radio"/> | <input type="radio"/> | <input type="radio"/> |
| Frequency-dependant attenuation (e.g. Q, damping, kappa(f) ...) * | <input type="radio"/> | <input type="radio"/> | <input type="radio"/> | <input type="radio"/> |
| Preferential direction of ground motion *                         | <input type="radio"/> | <input type="radio"/> | <input type="radio"/> | <input type="radio"/> |
| Vsz (travel time-averaged value at various depths) *              | <input type="radio"/> | <input type="radio"/> | <input type="radio"/> | <input type="radio"/> |
| Vs of the seismological bedrock *                                 | <input type="radio"/> | <input type="radio"/> | <input type="radio"/> | <input type="radio"/> |
| Depth of the seismological bedrock *                              | <input type="radio"/> | <input type="radio"/> | <input type="radio"/> | <input type="radio"/> |
| Depth of the engineering bedrock *                                | <input type="radio"/> | <input type="radio"/> | <input type="radio"/> | <input type="radio"/> |
| Vs(z) *                                                           | <input type="radio"/> | <input type="radio"/> | <input type="radio"/> | <input type="radio"/> |
| Vp(z) *                                                           | <input type="radio"/> | <input type="radio"/> | <input type="radio"/> | <input type="radio"/> |
| Water table depth *                                               | <input type="radio"/> | <input type="radio"/> | <input type="radio"/> | <input type="radio"/> |
| Dispersion curve *                                                | <input type="radio"/> | <input type="radio"/> | <input type="radio"/> | <input type="radio"/> |
| Rayleigh wave ellipticity curve *                                 | <input type="radio"/> | <input type="radio"/> | <input type="radio"/> | <input type="radio"/> |
| H/V curve *                                                       | <input type="radio"/> | <input type="radio"/> | <input type="radio"/> | <input type="radio"/> |
| Geo-stratigraphic 1D log model *                                  | <input type="radio"/> | <input type="radio"/> | <input type="radio"/> | <input type="radio"/> |
| Building code site class *                                        | <input type="radio"/> | <input type="radio"/> | <input type="radio"/> | <input type="radio"/> |
| vs30 *                                                            | <input type="radio"/> | <input type="radio"/> | <input type="radio"/> | <input type="radio"/> |
| Surface geology *                                                 | <input type="radio"/> | <input type="radio"/> | <input type="radio"/> | <input type="radio"/> |
| Morphology/topographic factor *                                   | <input type="radio"/> | <input type="radio"/> | <input type="radio"/> | <input type="radio"/> |
| Aggravation factor for basin and topography *                     | <input type="radio"/> | <input type="radio"/> | <input type="radio"/> | <input type="radio"/> |
| Non-linear curves (e.g. G/G0 and damping curves) *                | <input type="radio"/> | <input type="radio"/> | <input type="radio"/> | <input type="radio"/> |
| Geotechnical parameters *                                         | <input type="radio"/> | <input type="radio"/> | <input type="radio"/> | <input type="radio"/> |

Sort the parameters selected as "Mandatory", organizing within a list from the most to the less important parameter for you

PREVIOUS

NEXT

webquest.fr - Report an abuse case

**Fig. A30** Online Questionnaire: 3-degrees priority scale (“mandatory”, “recommended” or “optional”) for ranking the indicators to be included in the site-characterization database.



## EU-SERA WP7 : Questionnaire for site characterization in seismic site response studies

Do you feel that some important indicators are missing for site characterization within site effects studies?

- yes  
 no

If YES, please list the missing parameters:

PREVIOUS

SUBMIT

*Attention au vol de données : ne saisissez jamais de mots de passe dans un questionnaire.*

[Report an abuse case](#)

## EU-SERA WP7 : Questionnaire for site characterization in seismic site response studies

Thank you very much for your contribution !

[Report an abuse case](#)

**Fig. A31** Online Questionnaire: Report if some important site effects were missing or poorly represented by the proposed indicators.
