# Supplementary material for: Indicators for site characterization at seismic station: recommendation from a dedicated survey
Source: Springer Nature journal article supplement (doi:10.1007/s10518-021-01136-7), 2021-06-14
Supplement: MOESM2 [file 10518_2021_1136_MOESM2_ESM.pdf]

# GENERAL INFORMATION

|         |              |                  |                           |
|---------|--------------|------------------|---------------------------|
| Authors | Institutions | Contacts [email] | Compiling date [DD/MM/YY] |
|---------|--------------|------------------|---------------------------|

## Station description

|              |              |                  |                   |                  |
|--------------|--------------|------------------|-------------------|------------------|
| Station name | Network code | Latitude [WGS84] | Longitude [WGS84] | Sensor depth [m] |
|--------------|--------------|------------------|-------------------|------------------|

## Site characterization summary

| Indicators                              |               |                   |
|-----------------------------------------|---------------|-------------------|
| fo +/- std [Hz]                         | Value         | Quality index Qi1 |
|                                         | References    |                   |
|                                         | URL of report |                   |
| Vs30 +/- std [m/]                       | Value         | Quality index Qi1 |
|                                         | References    |                   |
|                                         | URL of report |                   |
| Velocity profiles [YES/NO]              | Value         | Quality index Qi1 |
|                                         | References    |                   |
|                                         | URL of report |                   |
| Surface geology [short description]     | Value         | Quality index Qi1 |
|                                         | References    |                   |
|                                         | URL of report |                   |
| Site class EC8                          | Value         | Quality index Qi1 |
|                                         | References    |                   |
|                                         | URL of report |                   |
| Seismological bedrock depth +/- std [m] | Value         | Quality index Qi1 |
|                                         | References    |                   |
|                                         | URL of report |                   |
| Engineering bedrock depth +/- std [m]   | Value         | Quality index Qi1 |
|                                         | References    |                   |
|                                         | URL of report |                   |

| Distance from the seismic station [m] |     | Final quality index (Final_QI) | Comments |
|---------------------------------------|-----|--------------------------------|----------|
| min                                   | min |                                |          |

# RESONANCE FREQUENCY

fo +/- STD [Hz]

Quality index 1

|        |            |               |
|--------|------------|---------------|
| Source | Earthquake | Ambient noise |
|--------|------------|---------------|

|                                                      |                   |                           |                         |              |
|------------------------------------------------------|-------------------|---------------------------|-------------------------|--------------|
| <b>Ambient noise</b>                                 | Method            | H/V                       | Ellipticity             | Other        |
|                                                      | fo +/- std [Hz]   |                           |                         |              |
| Experiment date [DD/MM/YY]                           |                   | Distance from station [m] | Lat. [WGS84]            | Lon. [WGS84] |
| <b>Environment</b>                                   |                   |                           |                         |              |
| Weather conditions                                   | Sunny             | Windy                     | Rain                    |              |
| Soil-sensor coupling                                 | Earth             | Asphalt                   | Artificial              |              |
| Urbanization                                         | None              | Dense                     | Scattered               |              |
| <b>Equipment</b>                                     |                   |                           |                         |              |
| Sensor                                               | Type [acc/vel]    | manufacturer              | cut-off frequency [Hz]  |              |
| Digitizer                                            | Type              | Manufacturer              | Sampling frequency [Hz] |              |
| Measurement                                          | Number            | Duration [min]            |                         |              |
| <b>Analysis</b>                                      |                   |                           |                         |              |
| Software                                             |                   |                           |                         |              |
| Smoothing type (e.g. triangular, Konno-Ohmachi, ...) | Window length [s] |                           |                         |              |
| <b>Fo uncertainty estimate from</b>                  |                   |                           |                         |              |
| Fo from individual windows                           | H/V curve width   | Manual picking            |                         |              |

|                             |                     |                       |                                                                                                      |              |                 |     |
|-----------------------------|---------------------|-----------------------|------------------------------------------------------------------------------------------------------|--------------|-----------------|-----|
| <b>Earthquake</b>           | Method              | HVSR                  | SSR                                                                                                  | GIT          | Other           |     |
|                             | fo +/- std [Hz]     |                       |                                                                                                      |              |                 |     |
| Recording period [DD/MM/YY] |                     | Number of earthquakes | Epicentral distance [km]                                                                             |              | Magnitude range |     |
| from                        | to                  |                       | from                                                                                                 | to           | from to         |     |
| <b>HVSR</b>                 | Seismic phase       | P                     | S                                                                                                    | Coda         | S + coda        | All |
|                             | Seismic phase       | P                     | S                                                                                                    | Coda         | S + coda        | All |
| <b>SSR</b>                  | Reference station   | Lat. (WGS84)          |                                                                                                      | Lon. (WGS84) |                 |     |
|                             | Reference station   | Lat. (WGS84)          |                                                                                                      | Lon. (WGS84) |                 |     |
| <b>GIT</b>                  | Parameters          | Free (to be inverted) |                                                                                                      |              | Imposed         |     |
|                             | Reference paper     |                       |                                                                                                      |              |                 |     |
|                             | Reference stations  | Number of stations    | Coordinates (WGS84) (lat., lon. of station 1; lat., lon. of station 2; ...; lat., lon. of station N) |              |                 |     |
|                             | window duration [s] | Min                   | Max                                                                                                  |              |                 |     |
|                             | window duration [s] | Min                   | Max                                                                                                  |              |                 |     |

# Vs30

Vs30 +/- STD [m/s]

Quality index 1

|        |                          |                           |         |                               |               |
|--------|--------------------------|---------------------------|---------|-------------------------------|---------------|
| Source | Geophysical measurements | Geotechnical measurements | Geology | Digital Elevation Model (DEM) | DEM & Geology |
|--------|--------------------------|---------------------------|---------|-------------------------------|---------------|

## Geophysical measurements

| Method                                           | Surface waves methods (active, passive methods)                           | Borehole methods (DH, CH, PS-Logging) |
|--------------------------------------------------|---------------------------------------------------------------------------|---------------------------------------|
| Vs30 +/- STD [m/s]                               | From Vs(z)                                                                | From Down-Hole                        |
|                                                  | From Vr40*<br><small>* Rayleigh phase velocity at 40 m wavelength</small> | From Cross-Hole                       |
|                                                  | From Vs <sub>z</sub> -Vs30 correlation                                    | From PS Logging                       |
| Reference relationship<br>Vs <sub>z</sub> - Vs30 |                                                                           |                                       |

## Geotechnical measurements

| Method                     | N-SPT                     | CPT          | Shear strength | OTHER |
|----------------------------|---------------------------|--------------|----------------|-------|
| Vs30 +/- STD [m/s]         |                           |              |                |       |
| Experiment date [DD/MM/YY] | Distance from station [m] | Lat. [WGS84] | Lon. [WGS84]   |       |

| Reference relationship<br>Vs30-geotechnical<br>parameter | N-SPT          |
|----------------------------------------------------------|----------------|
|                                                          | CPT            |
|                                                          | Shear strength |
|                                                          | Other          |

## Geology

| Method                                           | Geological map             | Stratigraphic log |              |
|--------------------------------------------------|----------------------------|-------------------|--------------|
| Vs30 +/- STD [m/s]                               |                            |                   |              |
| Geological map scale                             |                            |                   |              |
| Geological unit name                             |                            |                   |              |
| Stratigraphic log                                | Experiment date [DD/MM/YY] | Lat. [WGS84]      | Lon. [WGS84] |
| Reference relationship<br>Vs30-geology           |                            |                   |              |
| Reference relationship<br>Vs30-Stratigraphic log |                            |                   |              |

## Digital Elevation Model

|                                        |            |
|----------------------------------------|------------|
| Vs30 +/- STD [m/s]                     |            |
| DEM resolution                         |            |
| Reference relationship<br>Slope - Vs30 |            |
| Slope range (degree)                   | from<br>to |

## DEM & Geology

|                                                  |
|--------------------------------------------------|
| Vs30 +/- STD [m/s]                               |
| Reference relationship<br>Slope - Vs30 - geology |

# Vs profile

Quality index 1

|        |                                                              |            |                                                   |  |
|--------|--------------------------------------------------------------|------------|---------------------------------------------------|--|
| Source | <b>Non-invasive methods (active and/or passive seismics)</b> |            | <b>Invasive methods (measurement in borehole)</b> |  |
|        | Active surface waves                                         | Refraction | Cross-hole / Down-hole                            |  |
|        | Passive surface waves                                        | Reflection | Geotechnical methods (CPT, SPT, ...)              |  |
|        | HV / ellipticity                                             |            | PS-Logging                                        |  |

## Non-invasive : surface waves methods

|                            |                           |     |                              |                              |
|----------------------------|---------------------------|-----|------------------------------|------------------------------|
| Experiment date [DD/MM/YY] | Distance from station [m] |     | Lat. [WGS84] center location | Lon. [WGS84] center location |
|                            | Min                       | Max |                              |                              |

### Active surface waves acquisition layout

|                              |
|------------------------------|
| Minimum receiver spacing (m) |
| Profile length (m)*          |
| Geophones number             |
| Number of profiles           |

\* Provide the length for the various profiles (e.g. 46 m, 94 m)

|                                       |
|---------------------------------------|
| Geophone cut-off frequency (Hz)       |
| Geophone type (vertical / horizontal) |
| Geophone manufacturer                 |
| Source (hammer, vibrator, ...)        |
| Digitizer type                        |
| Digitizer manufacturer                |

|                    |       |       |      |                      |       |         |            |              |      |       |           |
|--------------------|-------|-------|------|----------------------|-------|---------|------------|--------------|------|-------|-----------|
| Weather conditions | Sunny | Windy | Rain | Soil-sensor coupling | Earth | Asphalt | Artificial | Urbanization | None | Dense | Scattered |
|--------------------|-------|-------|------|----------------------|-------|---------|------------|--------------|------|-------|-----------|

### Passive surface waves acquisition layout

|                        |
|------------------------|
| Number of sensors      |
| Minimum array aperture |
| Maximum array aperture |
| Number of arrays       |
| Minimum duration [min] |

|                                     |
|-------------------------------------|
| Sensor cut-off frequency (Hz)       |
| Sensor type (vertical / horizontal) |
| Sensor manufacturer                 |
| Digitizer type                      |
| Digitizer manufacturer              |

|                    |       |       |      |                      |       |         |            |              |      |       |           |
|--------------------|-------|-------|------|----------------------|-------|---------|------------|--------------|------|-------|-----------|
| Weather conditions | Sunny | Windy | Rain | Soil-sensor coupling | Earth | Asphalt | Artificial | Urbanization | None | Dense | Scattered |
|--------------------|-------|-------|------|----------------------|-------|---------|------------|--------------|------|-------|-----------|

### Type of dispersion and/or H/V estimates

|                  |
|------------------|
| Rayleigh DC      |
| Love DC          |
| Ellipticity      |
| H/V (DFA, EHVR)* |
| H/V (SH)*        |

Reference paper (Name, Journal, DOI)

### Dispersion curves

|                       |          |      |
|-----------------------|----------|------|
| Min wavelength (m)    | Rayleigh | Love |
| Max. wavelength (m)   |          |      |
| Min. phase vel. (m/s) |          |      |
| Max. phase vel. (m/s) |          |      |
| Modes (R0, L0, ...)   |          |      |

### H/V or Ellipticity curves

|                     |                     |
|---------------------|---------------------|
| Min. frequency (Hz) | Max. frequency (Hz) |
|---------------------|---------------------|

\* DFA: Diffuse wavefield approach; EHVR: H/V of earthquakes; SH: SH transfer function

### Inversion

|                                        |                    |                    |                          |                   |                     |
|----------------------------------------|--------------------|--------------------|--------------------------|-------------------|---------------------|
| Rayleigh waves                         | Love waves         | Ellipticity curves | H/V (DFA, EHVR)          | H/V (SH)          | resonance frequency |
| A priori information used in inversion | seismic refraction | stratigraphic log  | geotechnical information | water table depth |                     |
| Inversion algorithm/code               |                    |                    |                          |                   |                     |
| Reference                              |                    |                    |                          |                   |                     |

## Non-invasive : body waves methods

|                            |                           |     |                                 |                                 |
|----------------------------|---------------------------|-----|---------------------------------|---------------------------------|
| Experiment date [DD/MM/YY] | Distance from station [m] |     | Lat. [WGS84]<br>center location | Lon. [WGS84]<br>center location |
|                            | Min                       | Max |                                 |                                 |

### Acquisition layout

|                                     |
|-------------------------------------|
| Receiver spacing (m)                |
| Profile length (m)*                 |
| Geophones number                    |
| Number of profiles                  |
| Shot spacing (m) - reflection meas. |

|                                       |
|---------------------------------------|
| Geophone cut-off frequency (Hz)       |
| Geophone type (vertical / horizontal) |
| Geophone manufacturer                 |
| Source (hammer, vibrator, ...)        |
| Digitizer type                        |
| Digitizer manufacturer                |

\* Provide the length for the various profiles (e.g. 46 m, 94 m)

|                    |       |       |      |                      |       |         |            |              |      |       |           |
|--------------------|-------|-------|------|----------------------|-------|---------|------------|--------------|------|-------|-----------|
| Weather conditions | Sunny | Windy | Rain | Soil-sensor coupling | Earth | Asphalt | Artificial | Urbanization | None | Dense | Scattered |
|                    |       |       |      |                      |       |         |            |              |      |       |           |

### Processing methods

|                       |
|-----------------------|
| classical refraction  |
| refraction tomography |
| classical reflection  |
| advanced method       |

Reference paper (Name, Journal, DOI)

## Invasive methods

**OTHER**

**Down-Hole    Cross-Hole    PS-Logging    SPT    CPT**

|                                 |
|---------------------------------|
| Borehole depth (m)              |
| Geophone type                   |
| Source type                     |
| Distance between wells          |
| Depth resolution (m)            |
| Latitude (WGS84)                |
| Longitude (WGS84)               |
| Distance from station (m)       |
| P-wave velocity (if yes, check) |
| S-wave velocity (if yes, check) |

### Processing methods

|            |
|------------|
| Down-Hole  |
| Cross-Hole |
| PS-Logging |
| SPT        |
| CPT        |
| OTHER      |

Reference paper (Name, Journal, DOI) or ASTM norm

### Authoritative velocity profile

Note: You do not have to fill in all the columns. You can provide either single values for Vp or Vs (e.g. profiles derived from borehole measurements) or either a range for Vp and Vs (e.g. profiles derived from stochastic surface waves inversion)

|                         |     |    |                         |     |    |
|-------------------------|-----|----|-------------------------|-----|----|
| Is Vs derived from Vp ? | Yes | No | Is Vp derived from Vs ? | Yes | No |
|-------------------------|-----|----|-------------------------|-----|----|

|                  |                     |          |                 |          |                 |                 |                 |                 |                 |
|------------------|---------------------|----------|-----------------|----------|-----------------|-----------------|-----------------|-----------------|-----------------|
| Top depth<br>(m) | Bottom<br>depth (m) | Vp (m/s) | STD Vp<br>(m/s) | Vs (m/s) | STD Vs<br>(m/s) | Vs range        |                 | Vp range        |                 |
|                  |                     |          |                 |          |                 | Vs min<br>(m/s) | Vs max<br>(m/s) | Vp min<br>(m/s) | Vp max<br>(m/s) |

**Figure with authoritative velocity profiles**

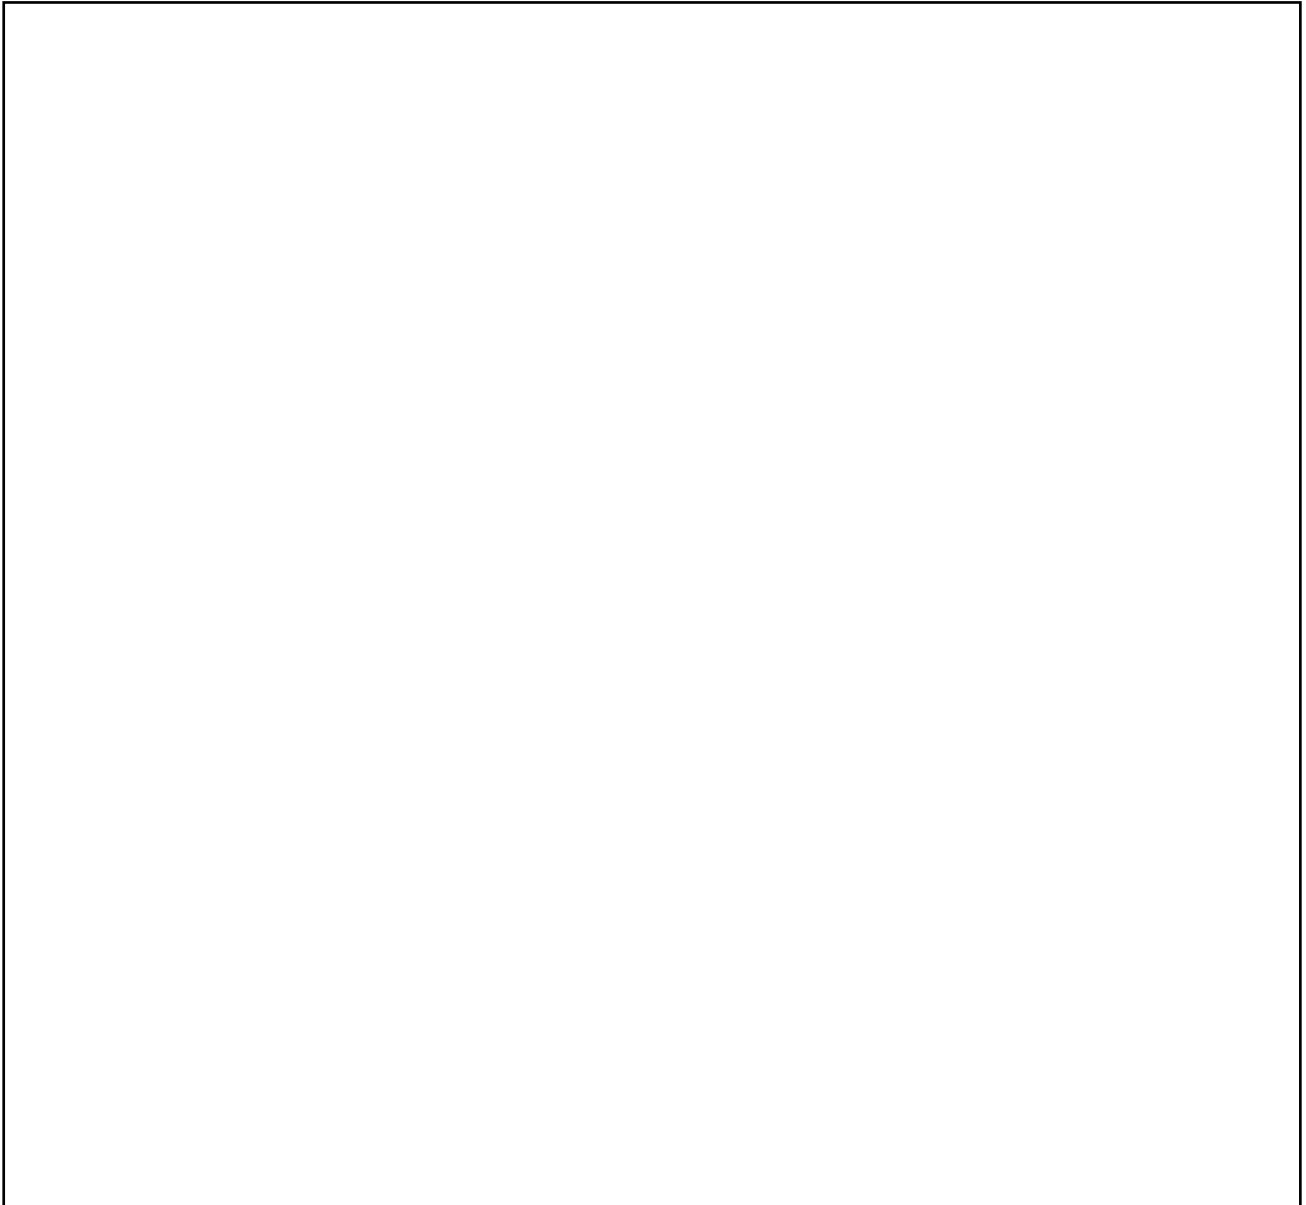

# Surface geology

Quality index 1

|               |                                             |              |                   |
|---------------|---------------------------------------------|--------------|-------------------|
| <b>Source</b> | Cartography (geological, lithological, ...) | Field survey | Stratigraphic log |
|---------------|---------------------------------------------|--------------|-------------------|

## Geological map

|                                             |                       |
|---------------------------------------------|-----------------------|
| <b>Map reference</b>                        |                       |
| <b>Map scale</b>                            |                       |
| <b>Map sheet</b>                            |                       |
| <b>Predominant geologic/lithologic unit</b> | Name :                |
|                                             | Description :         |
|                                             | Age :                 |
|                                             | Thickness :           |
|                                             | Rock mass structure : |
| <b>Fault presence</b>                       |                       |
| <b>Weathering</b>                           |                       |
| <b>Cross-section</b>                        |                       |

## Field survey

|                                             |                       |
|---------------------------------------------|-----------------------|
| <b>Map reference</b>                        |                       |
| <b>Map scale</b>                            |                       |
| <b>Predominant geologic/lithologic unit</b> | Name :                |
|                                             | Description :         |
|                                             | Age :                 |
|                                             | Thickness :           |
|                                             | Rock mass structure : |
| <b>Fault presence</b>                       |                       |
| <b>Weathering</b>                           |                       |
| <b>Cross-section</b>                        |                       |

## Stratigraphic log

|                                  |
|----------------------------------|
| <b>Distance from station (m)</b> |
| <b>log depth (m)</b>             |

|               |                  |                           |
|---------------|------------------|---------------------------|
| Top depth (m) | Bottom depth (m) | Stratigraphic description |
|---------------|------------------|---------------------------|



# Surface geology

---

## Map

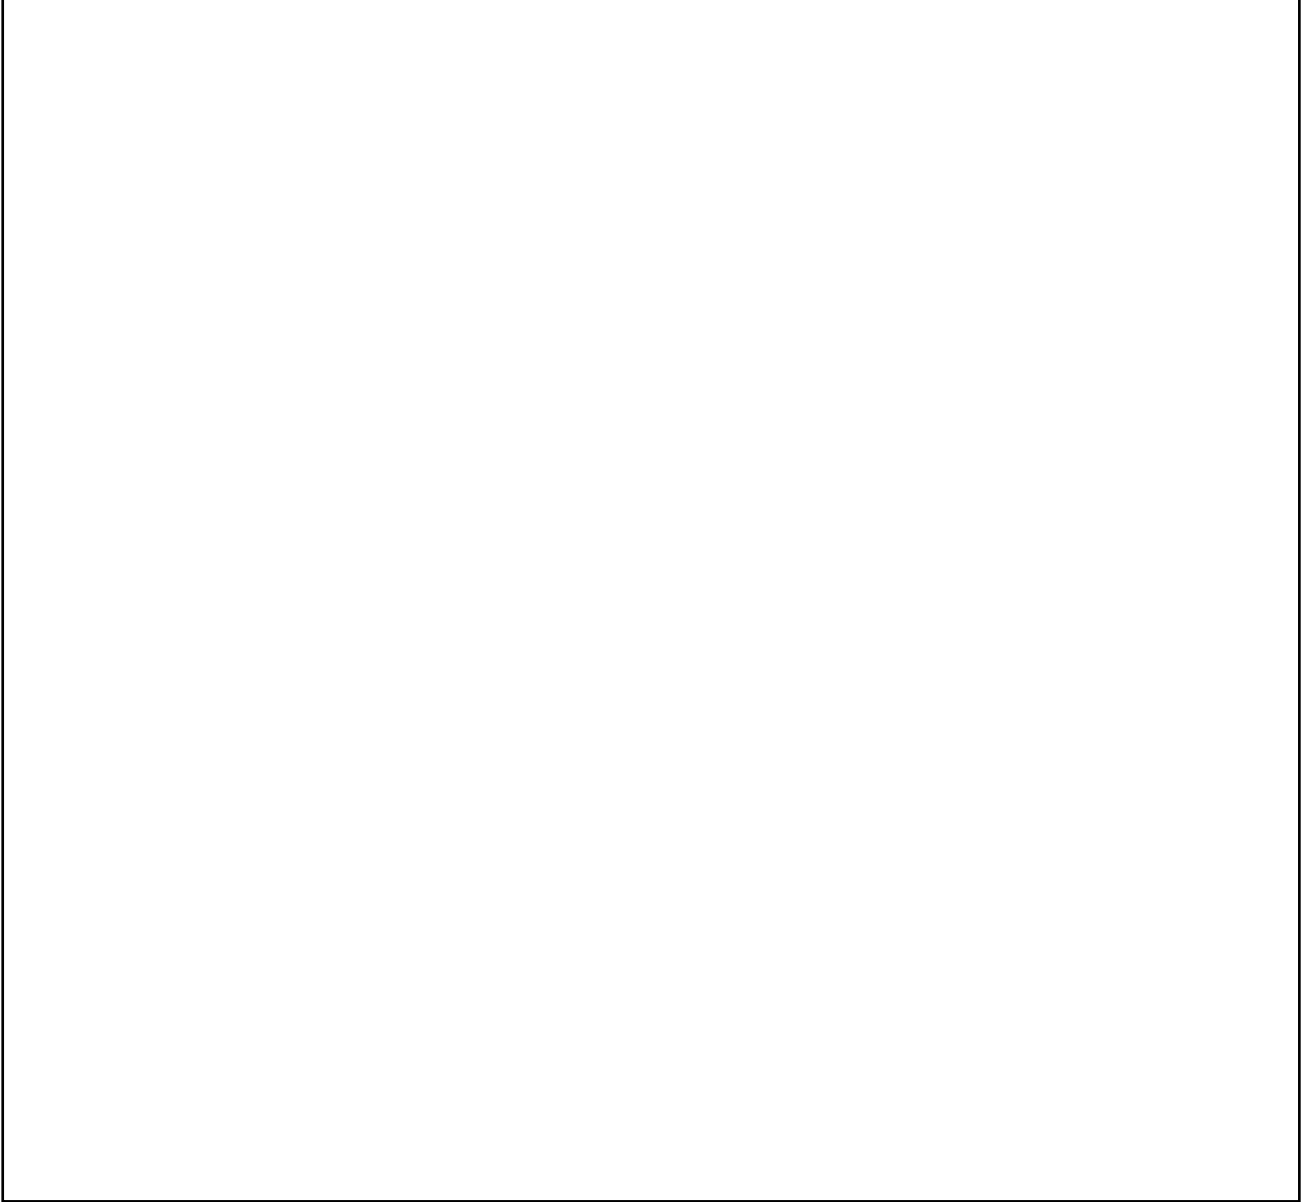

# Site class

|                 |
|-----------------|
| Site class      |
| Quality index 1 |

Reference building code for site classification  
(EC8-1, EC8-2, NEHRP, national code, ...)

|        |                          |                           |                               |         |               |
|--------|--------------------------|---------------------------|-------------------------------|---------|---------------|
| Source | Geophysical measurements | Geotechnical measurements | Digital Elevation Model (DEM) | Geology | DEM & Geology |
|--------|--------------------------|---------------------------|-------------------------------|---------|---------------|

Reference relationship geology - site class

Reference relationship slope from DEM - site class

Reference relationship slope from DEM - geology - site class

Parameters for deriving site class as prescribed in building code

# Seismological bedrock depth

|                   |
|-------------------|
| Depth +/- STD [m] |
| Quality index 1   |

|        |                     |         |                                                 |
|--------|---------------------|---------|-------------------------------------------------|
| Source | Vs profiles         | Geology | Other (gravity, seismic refraction, TDEM*, ...) |
|        | Resonance frequency |         |                                                 |

\* Time-Domain Electromagnetic Methods

|                          | Non-invasive methods | Invasive seismic methods | Geotechnical methods |
|--------------------------|----------------------|--------------------------|----------------------|
| Bedrock depth +/- STD(m) |                      |                          |                      |
| Bedrock Vs +/- STD(m)    |                      |                          |                      |
| Bedrock Vp +/- STD(m)    |                      |                          |                      |
| Is Vs derived from Vp ?  | Yes                  | No                       |                      |

## Resonance frequency

|                                              |
|----------------------------------------------|
| Bedrock depth +/- STD(m)                     |
| Reference relationship $F_0$ - bedrock depth |

## Geology

|                          |
|--------------------------|
| Bedrock depth +/- STD(m) |
| Bedrock geological unit  |
| Reference                |

## Stratigraphic log

|                          |
|--------------------------|
| Bedrock depth +/- STD(m) |
| Bedrock geological unit  |
| Reference                |

## Other methods

|                    | Bedrock depth +/- STD(m) | Reference |
|--------------------|--------------------------|-----------|
| Gravity            |                          |           |
| Seismic refraction |                          |           |
| Seismic reflection |                          |           |
| TDEM               |                          |           |

# Engineering bedrock depth

Depth +/- STD [m]

Quality index 1

Reference Vs related to engineering bedrock in m/s

Reference building code for site classification (EC8-1, EC8-2, NEHRP, national code, ...)

Source

Vs profile

Geology

Stratigraphic log

## Vs profile

|                          | Non-invasive methods | Invasive seismic methods | Geotechnical methods |
|--------------------------|----------------------|--------------------------|----------------------|
| Bedrock depth +/- STD(m) |                      |                          |                      |
| Is Vs derived from Vp ?  | Yes                  | No                       |                      |

## Geology

|                          |
|--------------------------|
| Bedrock depth +/- STD(m) |
| Bedrock geological unit  |
| Reference                |

## Stratigraphic log

|                          |
|--------------------------|
| Bedrock depth +/- STD(m) |
| Bedrock geological unit  |
| Reference                |
